# Supplementary material for: Indonesian Dentists’ Perception of the Use of Teledentistry
Source: PubMed Central journal article supplement (PMC9485514; doi:10.1016/j.identj.2022.04.001), 2022-05-12

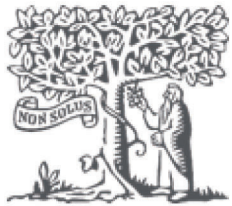

ELSEVIER

# Certificate of Elsevier Language Editing Services

The following article was edited by Elsevier Language Editing Services:  
"Indonesian Dentists' Perception Toward the Use of Teledentistry"

Authored by:

Yuniardini S Wimardhani, Anandina I Soegyanto

Date: 29-Jul-2021

Serial number: LE-217356-99F992271EAB

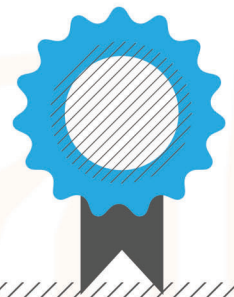

Supplement: mmc1.pdf [file mmc1.pdf]
